# Supplementary material for: Tailoring high-temperature radiation and the resurrection of the incandescent source
Source: Springer Nature journal article supplement (doi:10.1038/nnano.2015.309), 2016-01-08
Supplement: 41565_2016_BFnnano2015309_MOESM11_ESM.pdf [file 41565_2016_BFnnano2015309_MOESM11_ESM.pdf]

## Tailoring high-temperature radiation and the resurrection of the incandescent source

Ognjen Ilic, Peter Bermel, Gang Chen, John D. Joannopoulos, Ivan Celanovic, and Marin Soljačić

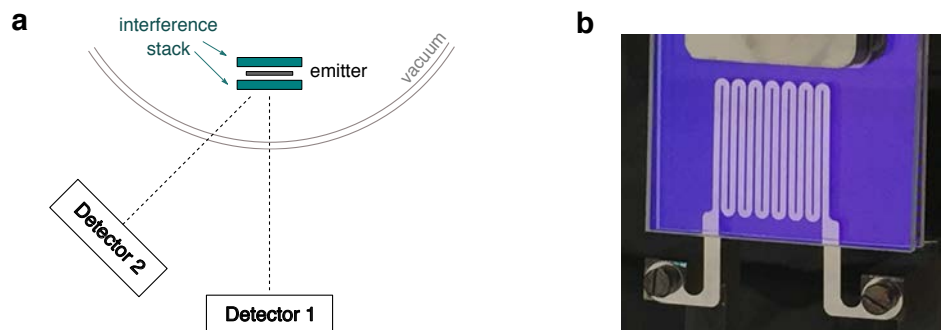

Supplementary Fig. 1 | Sketch of the experimental setup. (a) Two detectors measure the emitted spectra at  $0^\circ$  and  $45^\circ$  angles with respect to the surface of the emitter. They are calibrated to correct for any nonlinearity in the measured signal. The air in the setup is evacuated ( $P \sim 10^{-6}$  torr) and argon is added ( $P \sim 10^{-4}$  torr). (b) Tungsten emitter and surrounding interference stacks (on fused silica substrate) in the experimental setup.

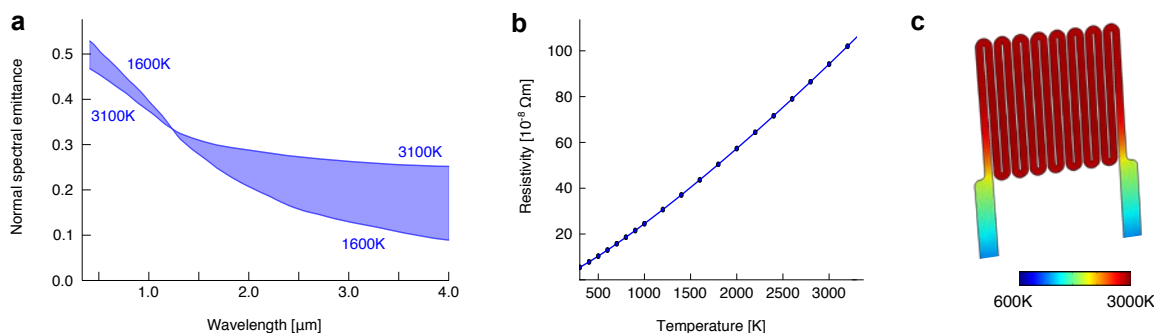

Supplementary Fig. 2 | Thermal emitter properties. (a) General trend for the high temperature normal spectral emittance of polished tungsten<sup>31</sup>, with a caveat that high temperature optical properties of refractory metals strongly depend on material purity and sample preparation. The shaded region covers the temperature range of 1600K-3100K. (b) Tungsten resistivity as a function of temperature<sup>34</sup>, used to estimate the temperature of the heated emitter. (c) Temperature distribution in a heated emitter (obtained by finite-element analysis, see Methods).

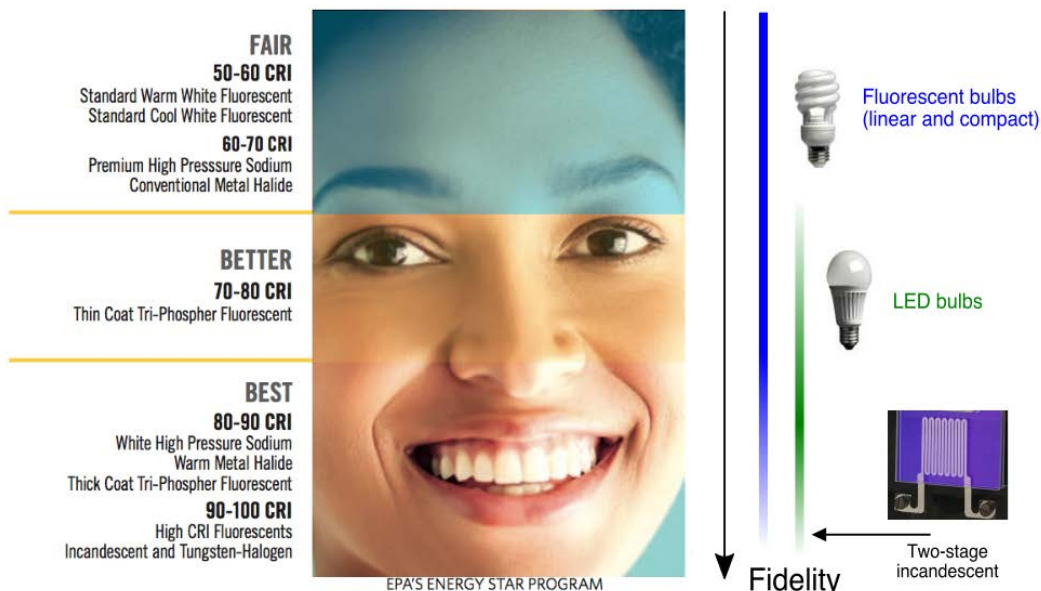

Supplementary Fig. 3 | Colour rendering index (CRI) comparison. Image (includes text) to the left of the fidelity arrow obtained from EnergyStar.gov. The rest of the figure is superimposed by the authors, using values from the main text of the manuscript (CFL and LED bulb pictures obtained from Energy.gov). For the CRI estimation of our device we use the hemispherical emittance values (corresponding to capturing the light output at every angle, for example in a reflector enclosure).

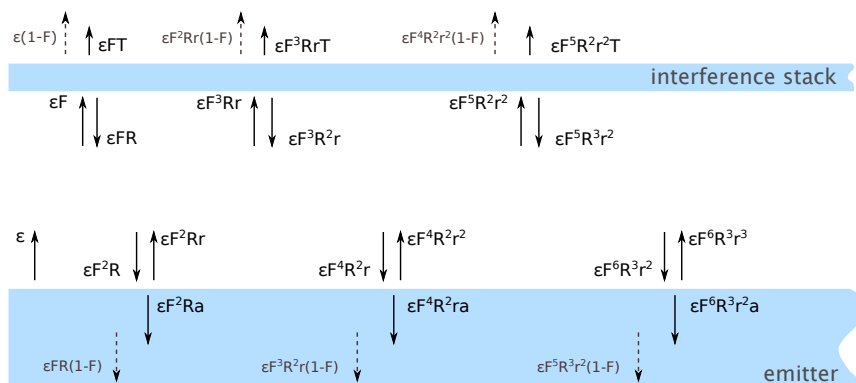

Supplementary Fig. 4 | Ray-tracing analysis for effective thermal emission. Analysis is performed (left to right) for the thermal emitter (bottom) surrounded by a reflecting interference stack (top). Stack transmissivity and reflectivity are denoted by  $T(\lambda)$  and  $R(\lambda)$ , respectively. Emitter emissivity is denoted by  $\epsilon(\lambda)$ , absorptivity by  $a(\lambda) = \epsilon(\lambda)$ , and reflectivity by  $r(\lambda) = 1 - \epsilon(\lambda)$ . Dashed arrows denote escaped rays that are not captured by either the emitter or the filtering structure.

**Derivation of the effective emissivity for thermal radiation.** Our model assumes a thermal emitter of emissivity  $\epsilon(\lambda, T)$ , surrounded by an interference structure of reflectivity  $R(\lambda)$  and transmissivity  $T(\lambda)$ . These labels refer to hemispherical quantities. E.g. for emissivity, if  $\theta$  denotes the

polar angle relative to the emitter surface, the spectral hemispherical emissivity can be expressed as:

$$\epsilon(\lambda) = \frac{\int_0^{\pi/2} \epsilon(\lambda, \theta) \sin(\theta) \cos(\theta) d\theta}{\int_0^{\pi/2} \sin(\theta) \cos(\theta) d\theta} \quad (\text{S1})$$

where  $\epsilon(\lambda, \theta)$  is the directional spectral emissivity. We assume the emissivity does not depend on the azimuthal angle ( $\phi$ ).

The emitter-interference structure geometry is characterized by a view-factor  $F$ , which equals the proportion of diffuse energy leaving the emitter that is directly intercepted by the surface of the filtering structure. To obtain the effective emissivity of the system, we consider multiple ray reflections in the cavity formed by the surrounding filtering structure (see Supplementary Fig. 4). With this in mind, the expressions for the transmitted rays ( $P_T$ ), the rays that escape the cavity ( $P_{EF}$ ), and the back-reflected rays that escape the thermal emitter ( $P_{EE}$ ) are given by:

$$\begin{aligned} P_T/P_0 &= \epsilon FT + \epsilon F^3 RrT + \epsilon F^5 R^2 r^2 T + \dots \\ &= \epsilon FT [1 + F^2 Rr + F^4 R^2 r^2 + \dots] \\ &= \epsilon \frac{FT}{1 - F^2 R(1 - \epsilon)} \\ P_{EF}/P_0 &= \epsilon(1 - F) + \epsilon(1 - F)F^2 Rr + \epsilon(1 - F)F^4 R^2 r^2 + \dots \\ &= \epsilon(1 - F) [1 + F^2 Rr + F^4 R^2 r^2 + \dots] \\ &= \epsilon \frac{1 - F}{1 - F^2 R(1 - \epsilon)} \\ P_{EE}/P_0 &= \epsilon FR(1 - F) + \epsilon F^3 R^2 r(1 - F) + \epsilon F^5 R^3 r^2(1 - F) + \dots \\ &= \epsilon(1 - F)FR [1 + F^2 Rr + F^4 R^2 r + \dots] \\ &= \epsilon \frac{(1 - F)FR}{1 - F^2 R(1 - \epsilon)} \end{aligned} \quad (\text{S2})$$

Combining the terms above, we obtain the effective emissivity as:

$$\epsilon_{eff} = \epsilon \left[ \frac{FT}{1 - F^2 R(1 - \epsilon)} + \frac{(1 - F)(1 + FR)}{1 - F^2 R(1 - \epsilon)} \right] \quad (\text{S3})$$

which reproduces equation (1) of the main text. The amount of power reabsorbed by the emitter ( $P_r$ ) can be calculated by summing up the contributions of all back-reflected rays:

$$\begin{aligned} P_r &= P_0 \epsilon [F^2 Ra + F^2 RrF^2 Ra + F^2 RrF^2 RrF^2 Ra + \dots] \\ P_r &= P_0 \epsilon F^2 Ra \sum_{n=0}^{\infty} [F^2 Rr]^n \\ P_r &= P_0 \frac{\epsilon^2 F^2 R}{1 - F^2 R(1 - \epsilon)} \end{aligned} \quad (\text{S4})$$

where the absorptivity of the emitter is given by Kirchoff's law  $a(\lambda, T) = \epsilon(\lambda, T)$ , and its reflectivity is equal to  $r(\lambda, T) = 1 - a(\lambda, T)$  (no transmission). Here  $P_0$  is the power originally emitted by the plain emitter at the same temperature. The emissivity above takes into account emission into all angles (hemispherical emissivity).

**Analysis of diffuse versus specular elements.** In the preceding section of the supplement, we approximated active surfaces (emitter and interference structure) as diffuse emitters as well as diffuse reflectors. This means that the optical properties of such structures are independent of direction. While the assumption of diffuse emission is often acceptable<sup>41</sup>, many optical elements may not be always adequately described as diffuse reflectors. In our case, both the polished metal emitter, as well as the interference multilayer stack may exhibit specular reflection peaks in the visible as well as the infra-red. With this in mind, we extend our analysis to include specular (e.g. mirror-like) reflections. As it turns out, in the geometry of our system, this distinction is not especially relevant, particularly for the integrated system quantities (such as the luminous efficiency, total absorbed and emitted power, etc.).

In contrast to the definition of a diffuse view factor, a specular view factor takes into account light intercepted by the receiving element via direct travel or any number of intermediate specular reflections. For two parallel directly opposed rectangles (labelled 1 and 2), of the same width and length, the specular view factor can be expressed as<sup>42</sup>:

$$F_{12}^s = F_{21}^s = K(1) + \sum_{n=1}^{\infty} R^n K(2n + 1) \tag{S5}$$

$$\frac{F_{11}^s}{r_2^s} = \frac{F_{22}^s}{r_1^s} = K(2) + \sum_{n=1}^{\infty} R^n K(2n + 2) \tag{S6}$$

Here,  $R = r_1^s r_2^s$  is the product of specular reflection coefficients of the two rectangular plates, and

$$K(m) = \frac{2m^2}{\pi X^2 Z} [K_1(m) + K_2(m) + K_3(m)] \tag{S7}$$

where

$$K_1(m) = \ln \left[ \frac{(1 + (X/m)^2)(1 + (XZ/m)^2)}{1 + (X/m)^2 + (XZ/m)^2} \right]^{1/2}$$

$$K_2(m) = \frac{XZ}{m} \left[ \sqrt{1 + (X/m)^2} \tan^{-1} \frac{XZ/m}{\sqrt{1 + (X/m)^2}} - \tan^{-1} \frac{XZ}{m} \right]$$

$$K_3(m) = \frac{X}{m} \left[ \sqrt{1 + (XZ/m)^2} \tan^{-1} \frac{X/m}{\sqrt{1 + (XZ/m)^2}} - \tan^{-1} \frac{X}{m} \right]$$

with  $X = a/D$ ,  $Z = b/a$ , where  $a, b$  are the lengths of sides of the rectangles, and  $D$  is the distance between them. We observe that the specular view factor, by definition, includes the multiple reflections that are the basis of equations (S2)-(S4). In addition, we note that the view factor depends on the reflectivity properties of the surface, which was not the case for the diffuse view factor.

Our system consists of an emitter and a surrounding interference structure (labelled 1 and 2) and the four surrounding sides (together labelled 3). Using the sum rule for the specular view factors in an enclosure, we write:

$$F_{13}^s = 1 - (1 - R^s)F_{12}^s - (1 - r^s)F_{11}^s \tag{S8}$$

where  $F_{13}^s$  is the specular view factor from the thermal emitter to the surrounding sides, and  $F_{11}^s$  is the specular view factor from the emitter to the filtering structure. Finally, the effective emissivity can be expressed as  $\epsilon_{eff} = \epsilon [F_{12}^s T + F_{13}^s]$ . For specular reflections, we found the difference in the integrated

system quantities relative to the purely diffuse case to be rather small: for luminous efficiency, the difference is under 5%; similar values apply to flux quantities, such as the total absorbed or total radiated power. The fact that heat flux calculations in our system are not very sensitive to the diffuse versus specular distinction is not too surprising. In fact, for most practical enclosures it suffices to calculate heat fluxes assuming purely diffuse reflectors, notable exceptions being active elements at the ends of long and narrow channels, and configurations with collimated irradiation<sup>41</sup>. Moreover, we recall the desired properties of an optimal interference structure - it has similar spectral properties for a broad range of angles. Hence, the ideal design has a directional reflectance that is close to the averaged, hemispherical value.

**Interference structure specifications.** The fabricated interference structure consists of 90 layers of alternating high ( $\text{Ta}_2\text{O}_5$ ) and low ( $\text{SiO}_2$ ) refractive index films of varying thicknesses. Starting from an optimal chirped quarterwave stack design (green, Fig. 1), the structure is further optimized as described in the Methods section. The optical profile of the fabricated interference structure (refractive index vs. the structure thickness) is shown in Supplementary Fig. 5 (for  $\lambda = 610\text{nm}$ ; refractive indices necessarily have dispersion). For clarity, we also present the interference structure specifications in a tabular form, both for the fabricated structure (shown in blue in Fig. 2) as well as for the structure that optimizes luminous efficiency (shown in red in Fig. 1; here  $n_{\text{Al}_2\text{O}_3} = 1.68$ ,  $n_{\text{TiO}_2} = 2.35$ ).

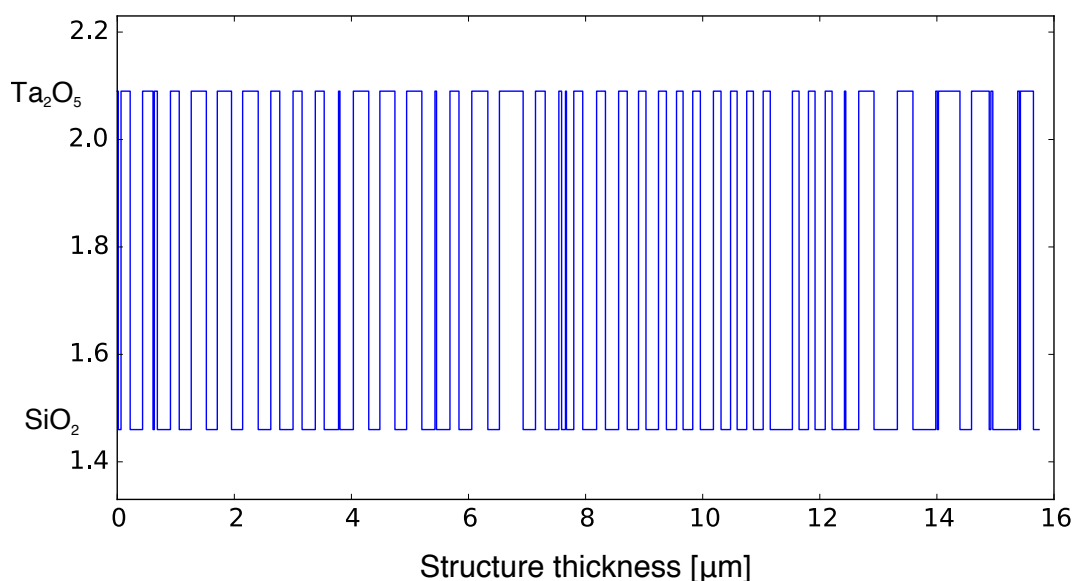

Supplementary Fig. 5 | Refractive index profile of the 90-layer fabricated interference structure.

#### References (Supplementary Materials)

41. Modest, M. Radiative Heat Transfer (Academic Press, ed. 3, 2013).
42. "Thermal design handbook - Part 1: View factors", European Cooperation for Space Standardization (ECSS) Handbooks and Technical Memoranda (ECSS-E-HB-31-01 Part 1A, 2011).

| #  | D [nm] | Material | #  | D [nm] | Material | #  | D [nm] | Material |
|----|--------|----------|----|--------|----------|----|--------|----------|
| 1  | 18     | Ta2O5    | 31 | 27     | Ta2O5    | 61 | 112    | Ta2O5    |
| 2  | 47     | SiO2     | 32 | 229    | SiO2     | 62 | 164    | SiO2     |
| 3  | 156    | Ta2O5    | 33 | 154    | Ta2O5    | 63 | 114    | Ta2O5    |
| 4  | 212    | SiO2     | 34 | 219    | SiO2     | 64 | 167    | SiO2     |
| 5  | 178    | Ta2O5    | 35 | 274    | Ta2O5    | 65 | 121    | Ta2O5    |
| 6  | 23     | SiO2     | 36 | 198    | SiO2     | 66 | 378    | SiO2     |
| 7  | 51     | Ta2O5    | 37 | 405    | Ta2O5    | 67 | 114    | Ta2O5    |
| 8  | 224    | SiO2     | 38 | 211    | SiO2     | 68 | 160    | SiO2     |
| 9  | 150    | Ta2O5    | 39 | 166    | Ta2O5    | 69 | 113    | Ta2O5    |
| 10 | 205    | SiO2     | 40 | 233    | SiO2     | 70 | 174    | SiO2     |
| 11 | 258    | Ta2O5    | 41 | 47     | Ta2O5    | 71 | 117    | Ta2O5    |
| 12 | 187    | SiO2     | 42 | 66     | SiO2     | 72 | 211    | SiO2     |
| 13 | 243    | Ta2O5    | 43 | 17     | Ta2O5    | 73 | 23     | Ta2O5    |
| 14 | 190    | SiO2     | 44 | 125    | SiO2     | 74 | 221    | SiO2     |
| 15 | 266    | Ta2O5    | 45 | 153    | Ta2O5    | 75 | 261    | Ta2O5    |
| 16 | 215    | SiO2     | 46 | 237    | SiO2     | 76 | 399    | SiO2     |
| 17 | 153    | Ta2O5    | 47 | 151    | Ta2O5    | 77 | 266    | Ta2O5    |
| 18 | 227    | SiO2     | 48 | 225    | SiO2     | 78 | 390    | SiO2     |
| 19 | 154    | Ta2O5    | 49 | 147    | Ta2O5    | 79 | 28     | Ta2O5    |
| 20 | 226    | SiO2     | 50 | 193    | SiO2     | 80 | 18     | SiO2     |
| 21 | 152    | Ta2O5    | 51 | 127    | Ta2O5    | 81 | 367    | Ta2O5    |
| 22 | 245    | SiO2     | 52 | 214    | SiO2     | 82 | 198    | SiO2     |
| 23 | 24     | Ta2O5    | 53 | 135    | Ta2O5    | 83 | 302    | Ta2O5    |
| 24 | 229    | SiO2     | 54 | 173    | SiO2     | 84 | 28     | SiO2     |
| 25 | 263    | Ta2O5    | 55 | 112    | Ta2O5    | 85 | 33     | Ta2O5    |
| 26 | 190    | SiO2     | 56 | 165    | SiO2     | 86 | 426    | SiO2     |
| 27 | 257    | Ta2O5    | 57 | 130    | Ta2O5    | 87 | 31     | Ta2O5    |
| 28 | 200    | SiO2     | 58 | 223    | SiO2     | 88 | 15     | SiO2     |
| 29 | 260    | Ta2O5    | 59 | 130    | Ta2O5    | 89 | 222    | Ta2O5    |
| 30 | 224    | SiO2     | 60 | 163    | SiO2     | 90 | 96     | SiO2     |

Supplementary Fig. 6 | Specifications for the 90-layer fabricated interference structure.

| #  | D [nm] | Material | #   | D [nm] | Material | #   | D [nm] | Material | #   | D [nm] | Material |
|----|--------|----------|-----|--------|----------|-----|--------|----------|-----|--------|----------|
| 1  | 494    | TiO2     | 81  | 36     | Al2O3    | 161 | 9      | Al2O3    | 241 | 126    | Al2O3    |
| 2  | 500    | SiO2     | 82  | 436    | SiO2     | 162 | 296    | SiO2     | 242 | 138    | TiO2     |
| 3  | 94     | Al2O3    | 83  | 112    | Al2O3    | 163 | 111    | Al2O3    | 243 | 169    | SiO2     |
| 4  | 490    | TiO2     | 84  | 245    | TiO2     | 164 | 192    | TiO2     | 244 | 110    | TiO2     |
| 5  | 118    | Al2O3    | 85  | 162    | SiO2     | 165 | 76     | Al2O3    | 245 | 167    | SiO2     |
| 6  | 500    | SiO2     | 86  | 38     | Al2O3    | 166 | 114    | SiO2     | 246 | 114    | TiO2     |
| 7  | 117    | Al2O3    | 87  | 343    | TiO2     | 167 | 210    | TiO2     | 247 | 189    | SiO2     |
| 8  | 500    | TiO2     | 88  | 1      | Ta2O5    | 168 | 21     | Ta2O5    | 248 | 117    | TiO2     |
| 9  | 115    | Al2O3    | 89  | 80     | Al2O3    | 169 | 50     | Al2O3    | 249 | 52     | Al2O3    |
| 10 | 500    | SiO2     | 90  | 500    | SiO2     | 170 | 263    | SiO2     | 250 | 145    | SiO2     |
| 11 | 123    | Al2O3    | 91  | 247    | TiO2     | 171 | 23     | Al2O3    | 251 | 120    | TiO2     |
| 12 | 382    | TiO2     | 92  | 36     | Al2O3    | 172 | 125    | TiO2     | 252 | 157    | SiO2     |
| 13 | 123    | Al2O3    | 93  | 38     | SiO2     | 173 | 126    | Al2O3    | 253 | 121    | TiO2     |
| 14 | 500    | SiO2     | 94  | 170    | Al2O3    | 174 | 123    | SiO2     | 254 | 123    | SiO2     |
| 15 | 123    | Al2O3    | 95  | 259    | TiO2     | 175 | 247    | TiO2     | 255 | 33     | Al2O3    |
| 16 | 383    | TiO2     | 96  | 135    | Al2O3    | 176 | 152    | SiO2     | 256 | 116    | TiO2     |
| 17 | 113    | Al2O3    | 97  | 332    | SiO2     | 177 | 103    | Al2O3    | 257 | 99     | SiO2     |
| 18 | 500    | SiO2     | 98  | 56     | Al2O3    | 178 | 147    | TiO2     | 258 | 65     | Al2O3    |
| 19 | 114    | Al2O3    | 99  | 137    | TiO2     | 179 | 94     | Al2O3    | 259 | 103    | TiO2     |
| 20 | 380    | TiO2     | 100 | 96     | Ta2O5    | 180 | 168    | SiO2     | 260 | 152    | SiO2     |
| 21 | 100    | Al2O3    | 101 | 312    | SiO2     | 181 | 105    | Al2O3    | 261 | 41     | Al2O3    |
| 22 | 500    | SiO2     | 102 | 52     | Al2O3    | 182 | 124    | TiO2     | 262 | 99     | TiO2     |
| 23 | 98     | Al2O3    | 103 | 228    | TiO2     | 183 | 69     | Al2O3    | 263 | 200    | SiO2     |
| 24 | 380    | TiO2     | 104 | 173    | Al2O3    | 184 | 172    | SiO2     | 264 | 81     | TiO2     |
| 25 | 112    | Al2O3    | 105 | 219    | SiO2     | 185 | 27     | Al2O3    | 265 | 177    | SiO2     |
| 26 | 378    | SiO2     | 106 | 135    | Al2O3    | 186 | 212    | TiO2     | 266 | 91     | TiO2     |
| 27 | 100    | Al2O3    | 107 | 227    | TiO2     | 187 | 11     | Ta2O5    | 267 | 148    | SiO2     |
| 28 | 254    | TiO2     | 108 | 43     | Al2O3    | 188 | 20     | Al2O3    | 268 | 123    | TiO2     |
| 29 | 73     | Al2O3    | 109 | 344    | SiO2     | 189 | 85     | SiO2     | 269 | 90     | SiO2     |
| 30 | 406    | SiO2     | 110 | 234    | TiO2     | 190 | 67     | Al2O3    | 270 | 35     | Al2O3    |
| 31 | 109    | Al2O3    | 111 | 59     | Al2O3    | 191 | 187    | TiO2     | 271 | 120    | TiO2     |
| 32 | 369    | TiO2     | 112 | 247    | SiO2     | 192 | 46     | Al2O3    | 272 | 116    | SiO2     |
| 33 | 69     | Al2O3    | 113 | 31     | Al2O3    | 193 | 159    | SiO2     | 273 | 120    | TiO2     |
| 34 | 500    | SiO2     | 114 | 246    | TiO2     | 194 | 78     | Al2O3    | 274 | 161    | SiO2     |
| 35 | 84     | Al2O3    | 115 | 458    | SiO2     | 195 | 121    | TiO2     | 275 | 108    | TiO2     |
| 36 | 376    | TiO2     | 116 | 230    | TiO2     | 196 | 56     | Al2O3    | 276 | 132    | SiO2     |
| 37 | 87     | Al2O3    | 117 | 34     | Ta2O5    | 197 | 242    | SiO2     | 277 | 101    | TiO2     |
| 38 | 500    | SiO2     | 118 | 274    | SiO2     | 198 | 31     | Al2O3    | 278 | 128    | SiO2     |
| 39 | 60     | Al2O3    | 119 | 45     | Al2O3    | 199 | 142    | TiO2     | 279 | 95     | TiO2     |
| 40 | 243    | TiO2     | 120 | 232    | TiO2     | 200 | 22     | Al2O3    | 280 | 153    | SiO2     |
| 41 | 122    | Al2O3    | 121 | 335    | SiO2     | 201 | 210    | SiO2     | 281 | 98     | TiO2     |
| 42 | 328    | SiO2     | 122 | 54     | Al2O3    | 202 | 12     | Al2O3    | 282 | 105    | SiO2     |
| 43 | 79     | Al2O3    | 123 | 214    | TiO2     | 203 | 189    | TiO2     | 283 | 116    | TiO2     |
| 44 | 9      | Ta2O5    | 124 | 64     | Al2O3    | 204 | 203    | SiO2     | 284 | 90     | SiO2     |
| 45 | 336    | TiO2     | 125 | 244    | SiO2     | 205 | 29     | Al2O3    | 285 | 102    | TiO2     |
| 46 | 71     | Al2O3    | 126 | 104    | Al2O3    | 206 | 166    | TiO2     | 286 | 82     | SiO2     |
| 47 | 500    | SiO2     | 127 | 154    | TiO2     | 207 | 256    | SiO2     | 287 | 111    | TiO2     |
| 48 | 41     | Al2O3    | 128 | 127    | Al2O3    | 208 | 148    | TiO2     | 288 | 128    | SiO2     |
| 49 | 359    | TiO2     | 129 | 241    | SiO2     | 209 | 220    | SiO2     | 289 | 80     | TiO2     |
| 50 | 133    | Al2O3    | 130 | 36     | Al2O3    | 210 | 56     | Al2O3    | 290 | 198    | SiO2     |
| 51 | 197    | SiO2     | 131 | 241    | TiO2     | 211 | 131    | TiO2     | 291 | 6      | TiO2     |
| 52 | 237    | TiO2     | 132 | 92     | Al2O3    | 212 | 203    | SiO2     | 292 | 203    | SiO2     |
| 53 | 500    | SiO2     | 133 | 189    | SiO2     | 213 | 164    | TiO2     | 293 | 59     | TiO2     |
| 54 | 93     | Al2O3    | 134 | 78     | Al2O3    | 214 | 70     | Ta2O5    | 294 | 165    | SiO2     |
| 55 | 130    | Ta2O5    | 135 | 126    | TiO2     | 215 | 163    | SiO2     | 295 | 98     | TiO2     |
| 56 | 243    | TiO2     | 136 | 89     | Al2O3    | 216 | 137    | TiO2     | 296 | 89     | SiO2     |
| 57 | 100    | Al2O3    | 137 | 325    | SiO2     | 217 | 104    | Al2O3    | 297 | 116    | TiO2     |
| 58 | 304    | SiO2     | 138 | 54     | Al2O3    | 218 | 147    | SiO2     | 298 | 76     | SiO2     |
| 59 | 111    | Al2O3    | 139 | 10     | Ta2O5    | 219 | 129    | TiO2     | 299 | 259    | TiO2     |
| 60 | 241    | TiO2     | 140 | 219    | TiO2     | 220 | 238    | SiO2     | 300 | 147    | SiO2     |
| 61 | 106    | Al2O3    | 141 | 40     | Al2O3    | 221 | 128    | TiO2     |     |        |          |
| 62 | 273    | SiO2     | 142 | 100    | SiO2     | 222 | 199    | SiO2     |     |        |          |
| 63 | 143    | Al2O3    | 143 | 52     | Al2O3    | 223 | 48     | Al2O3    |     |        |          |
| 64 | 259    | TiO2     | 144 | 8      | Ta2O5    | 224 | 131    | TiO2     |     |        |          |
| 65 | 123    | Al2O3    | 145 | 218    | TiO2     | 225 | 4      | Al2O3    |     |        |          |
| 66 | 461    | SiO2     | 146 | 69     | Al2O3    | 226 | 230    | SiO2     |     |        |          |
| 67 | 84     | Al2O3    | 147 | 313    | SiO2     | 227 | 128    | TiO2     |     |        |          |
| 68 | 252    | TiO2     | 148 | 21     | Al2O3    | 228 | 64     | Al2O3    |     |        |          |
| 69 | 152    | Al2O3    | 149 | 114    | TiO2     | 229 | 155    | SiO2     |     |        |          |
| 70 | 62     | SiO2     | 150 | 3      | Al2O3    | 230 | 130    | TiO2     |     |        |          |
| 71 | 141    | Al2O3    | 151 | 362    | SiO2     | 231 | 231    | SiO2     |     |        |          |
| 72 | 256    | TiO2     | 152 | 69     | Al2O3    | 232 | 109    | TiO2     |     |        |          |
| 73 | 75     | Al2O3    | 153 | 236    | TiO2     | 233 | 183    | SiO2     |     |        |          |
| 74 | 500    | SiO2     | 154 | 17     | Ta2O5    | 234 | 49     | Al2O3    |     |        |          |
| 75 | 92     | Al2O3    | 155 | 114    | Al2O3    | 235 | 137    | TiO2     |     |        |          |
| 76 | 280    | TiO2     | 156 | 44     | Ta2O5    | 236 | 209    | SiO2     |     |        |          |
| 77 | 143    | Al2O3    | 157 | 199    | TiO2     | 237 | 119    | TiO2     |     |        |          |
| 78 | 56     | SiO2     | 158 | 85     | Al2O3    | 238 | 210    | SiO2     |     |        |          |
| 79 | 283    | TiO2     | 159 | 309    | SiO2     | 239 | 119    | TiO2     |     |        |          |
| 80 | 92     | Ta2O5    | 160 | 132    | TiO2     | 240 | 74     | SiO2     |     |        |          |

Supplementary Fig. 7 | Specifications for the structure that optimizes luminous efficiency.
